# Supplementary material for: Evaluation of the Cytotoxicity of Cationic Polymers on Glioblastoma Cancer Stem Cells
Source: MDPI journal article supplement (doi:10.3390/jfb14010017), 2022-12-28
Supplement: s1 [file s1]

# Supplementary Information

## Evaluation of the Cytotoxicity of Cationic Polymers on Glioblastoma Cancer Stem Cells

Conor McCartin <sup>1,†</sup>, Juliette Blumberger <sup>1,†</sup>, Candice Dussouillez <sup>1</sup>, Patricia Fernandez de Larrinoa <sup>1,2</sup>, Monique Dontenwill <sup>3</sup>, Christel Herold-Mende <sup>4</sup>, Philippe Lavallo <sup>5</sup>, Béatrice Heurtault <sup>1</sup>, Stéphane Bellemin-Lapponnaz <sup>2</sup>, Sylvie Fournel <sup>1,\*</sup> and Antoine Kichler <sup>1,\*</sup>

<sup>1</sup> 3Bio Team, CAMB UMR7199 CNRS–University of Strasbourg, Faculté de Pharmacie, 74 route du Rhin, F-67401 Illkirch, France

<sup>2</sup> Institut de Physique et Chimie des Matériaux de Strasbourg (IPCMS) UMR7504, Université de Strasbourg & CNRS 23 rue du Loess, F-67083 Strasbourg, France

<sup>3</sup> Laboratoire de Bioimagerie et Pathologies UMR CNRS 7021 (LBP), Faculté de Pharmacie, 74 route du Rhin, F-67401 Illkirch, France

<sup>4</sup> Division of Neurosurgical Research, Department of Neurosurgery, University of Heidelberg, 69120 Heidelberg, Germany

<sup>5</sup> Institut National de la Santé et de la Recherche Médicale, Inserm UMR\_S 1121 Biomaterials and Bioengineering, F-67085 Strasbourg, France

\* Correspondence: s.fournel@unistra.fr (S.F.); kichler@unistra.fr (A.K.)

† These authors contributed equally to this work.

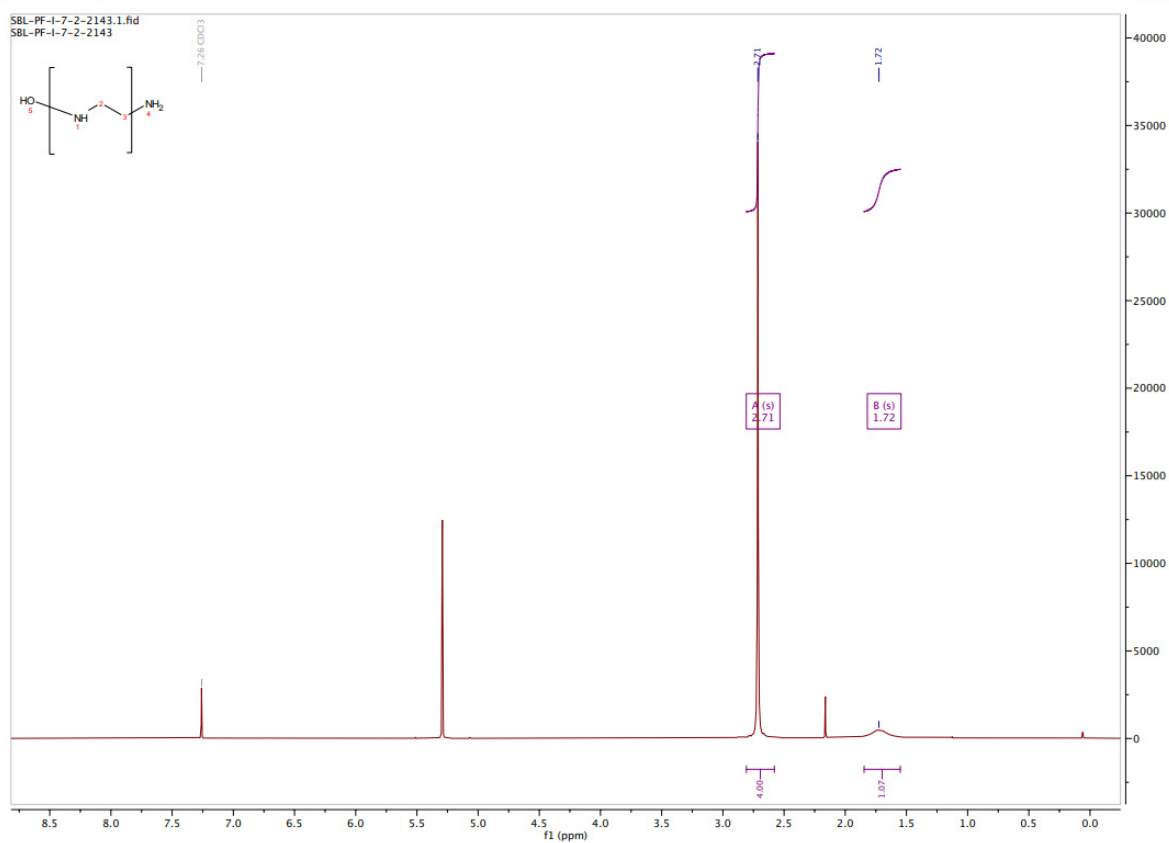

**Figure S1. <sup>1</sup>H NMR spectrum of synthesised 22 kDa L-PEI. 400 MHz, CDCl<sub>3</sub>.**

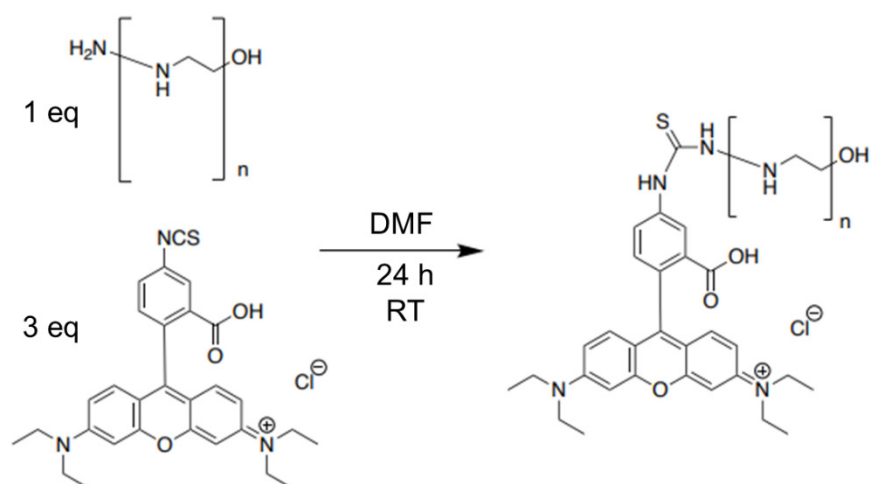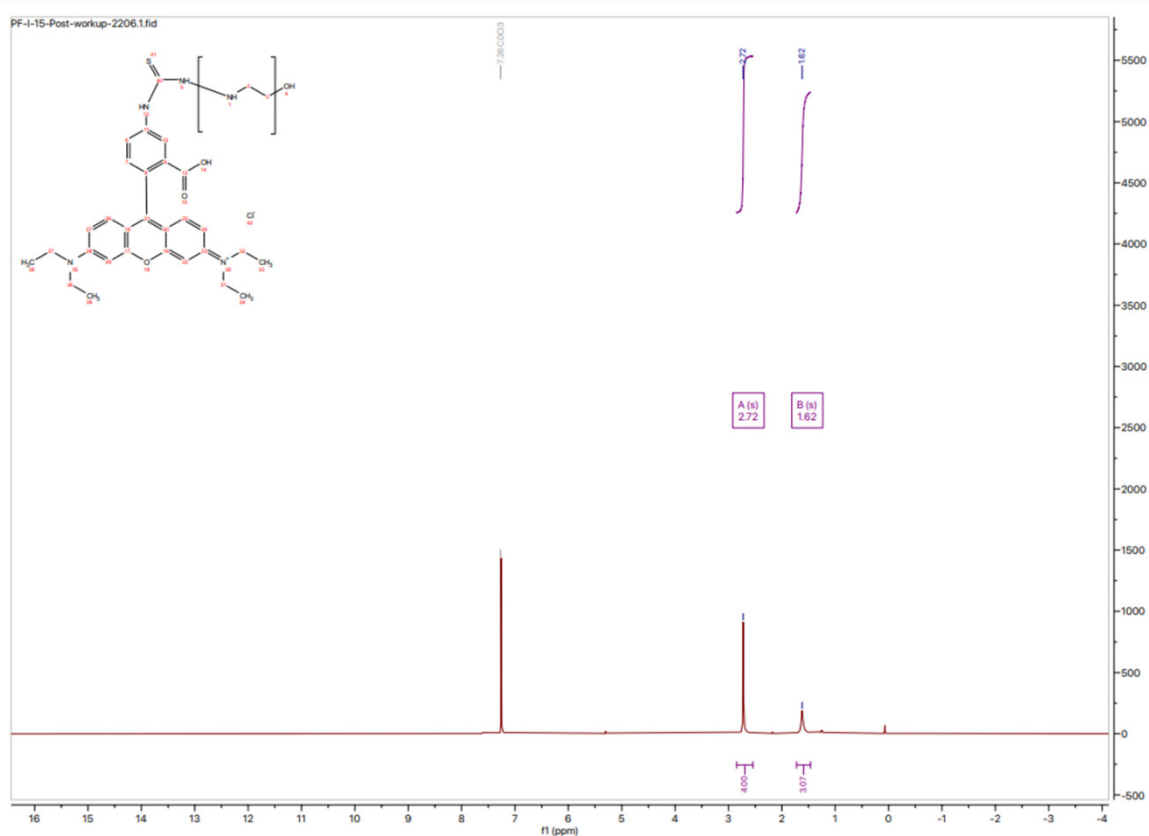

**Figure S2. Reaction schematic and  $^1\text{H}$  NMR spectrum of synthesised 22 kDa L-PEI. 300 MHz,  $\text{CDCl}_3$ .**

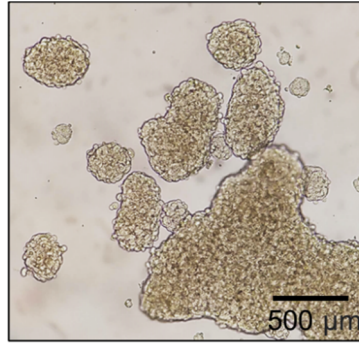

**Figure S3. NCH421K spheroid cell culture.** Inverted light microscope image of NCH421K spheroids grown in 96 well culture dishes for 4 days before imaging at  $4\times * 10\times = 400\times$  magnification using an Axio Vert A1 inverted light microscope (Zeiss) coupled to a ProgRes C5 cool (Jenoptik) camera.

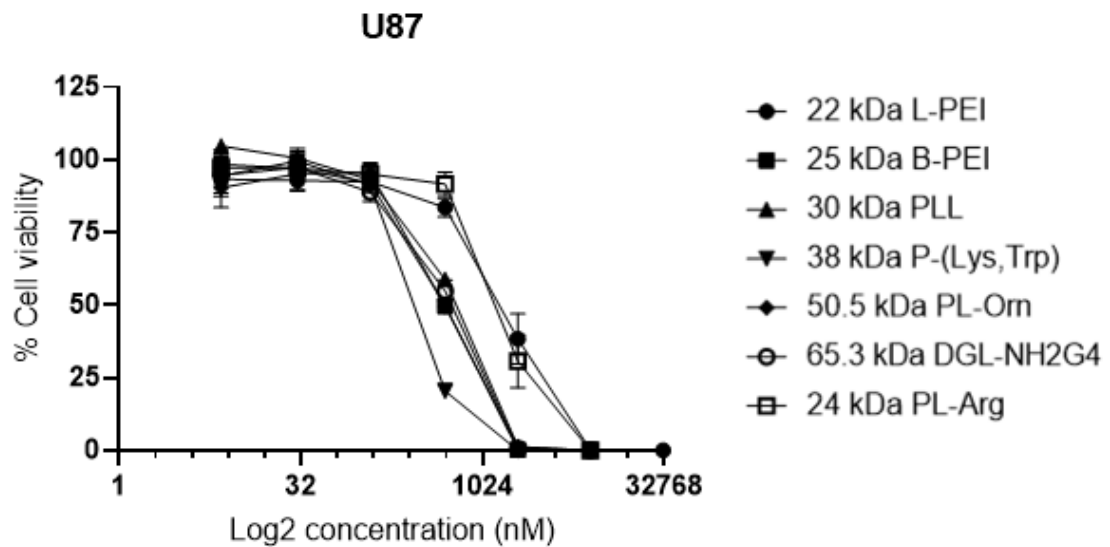

**Figure S4. IC50s for the U87-MG cell line.** CelltiterGlo 3D viability dose-response of 24 h treated U87 cells. Values represent the mean of at least  $n = 3$  independent replicates. Error bars represent  $\pm$  one SEM.

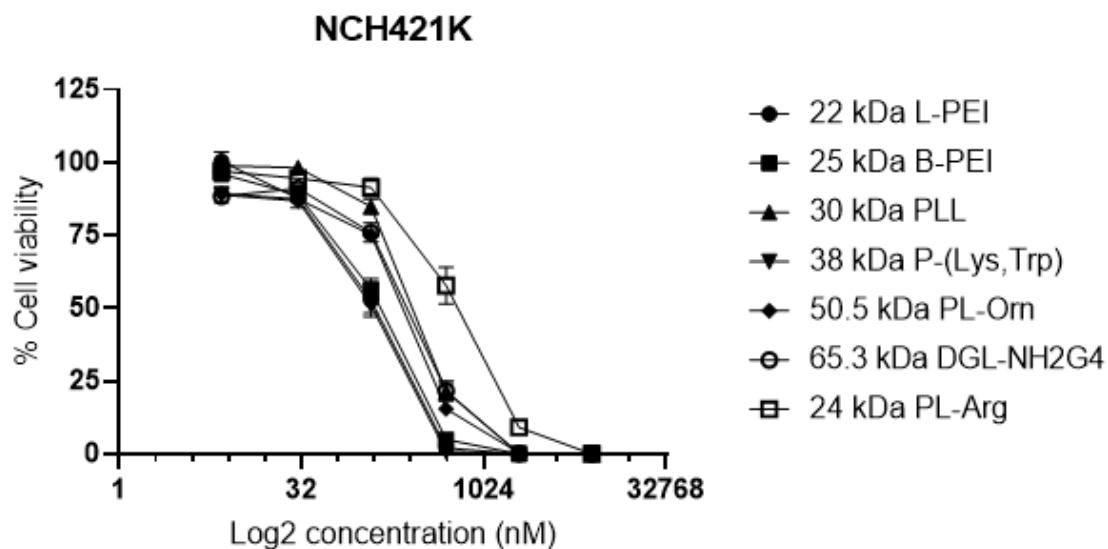

**Figure S5. IC50s for the GSC cell line NCH421K.** CelltiterGlo 3D viability dose-response of 24 h treated NCH421K cells. Values represent the mean of at least  $n = 3$  independent replicates. Error bars represent  $\pm$  one SEM.

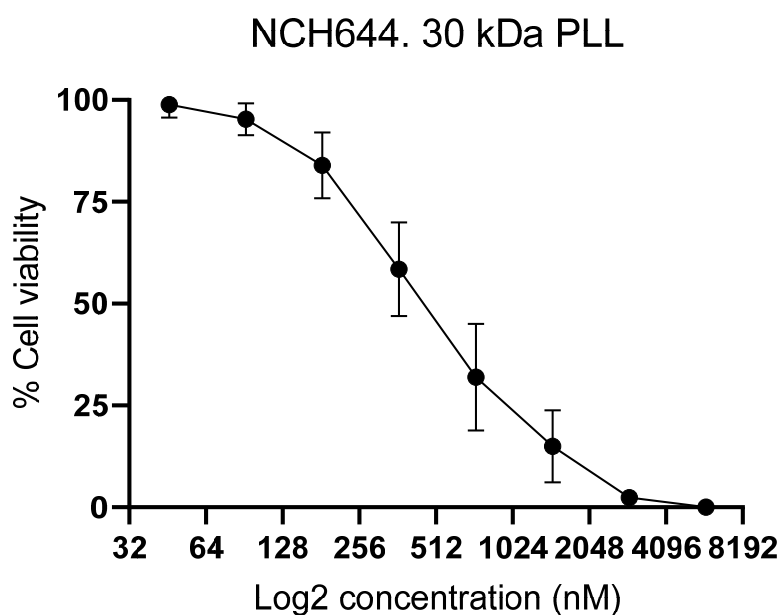

**Figure S6. IC50s for the GSC cell line NCH644.** CelltiterGlo 3D viability dose-response of 24 h treated NCH644 cells. Values represent the mean of at least  $n = 3$  independent replicates. Error bars represent  $\pm$  one SEM.

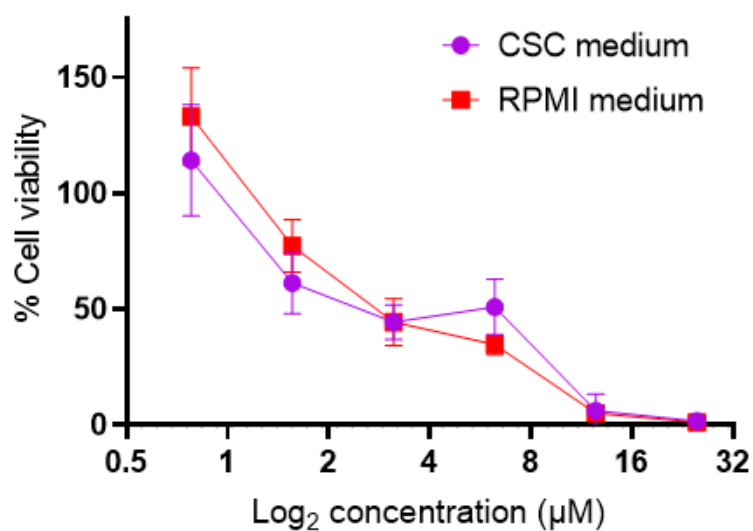

**Figure S7. Lack of culture medium dependent toxicity for NHC-Ir(III).** CelltiterGlo 3D viability dose-response of 24 h treated U87 cells in either their normal (RPMI) or CSC medium. Values represent the mean of at least  $n = 3$  independent replicates. Error bars represent  $\pm$  one SEM.

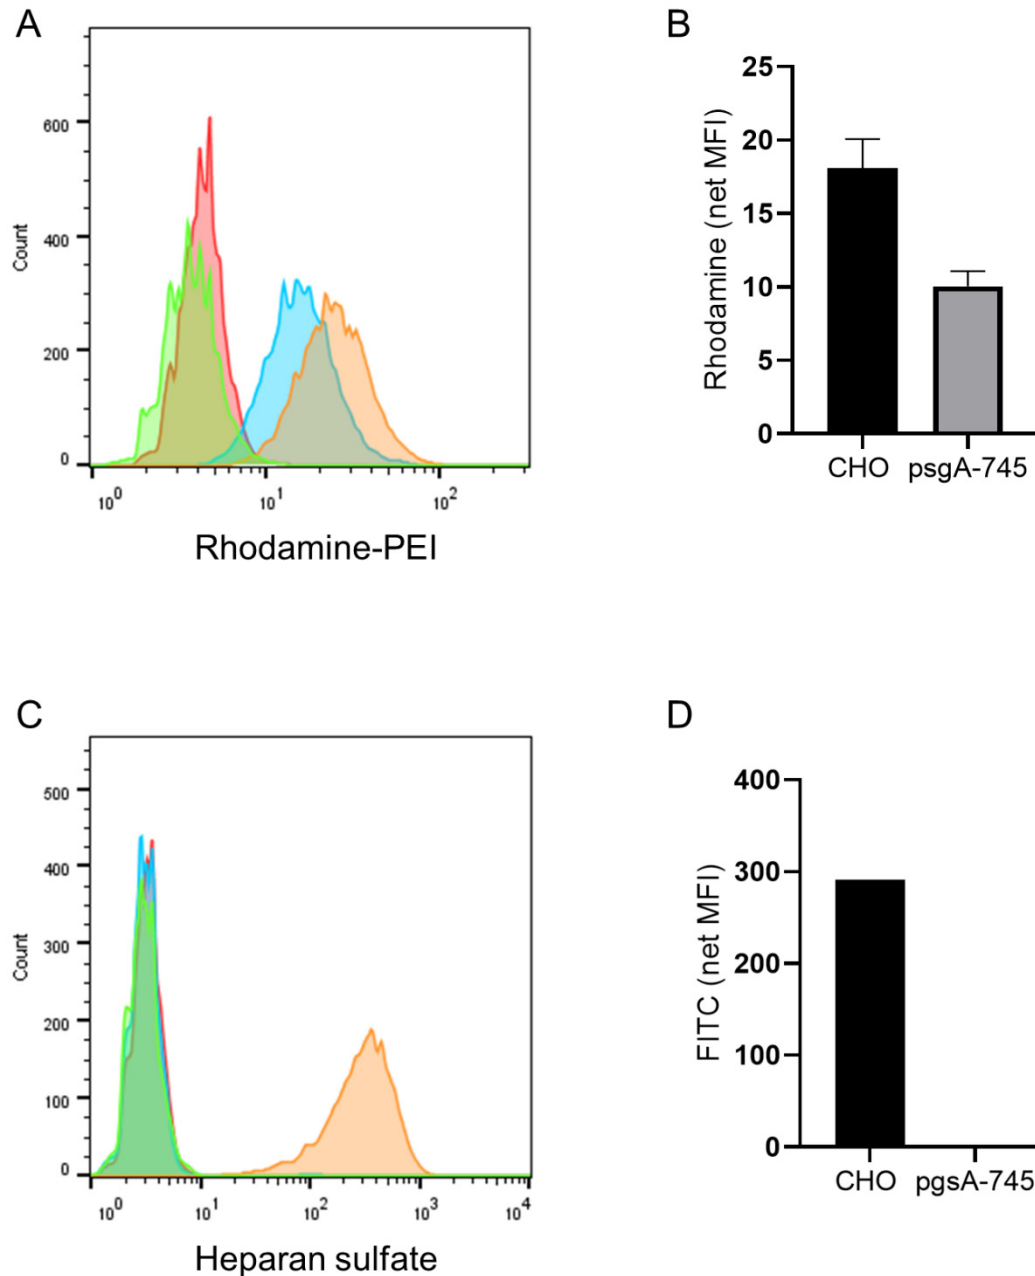

**Figure S8. Reduced PEI affinity of glycosaminoglycan deficient CHO cells.** (A) Representative fluorescence histograms (FlowJo) of 2 h, 37 °C Rhodamine-PEI incubated CHO-K1 WT and CHO-pgsA-745 mutant cells. (B) Bar charts of net MFI (median) (MFI stained – MFI unstained) of stained cells. Values represent the mean of  $n = 2$  independent experiments  $\pm$  one SEM. (C) Representative fluorescence histograms (FlowJo) of heparan sulfate stained CHO-K1 WT and CHO-pgsA-745 mutant cells. (D) Bar charts of net MFI (median) (MFI stained – MFI unstained) of stained cells. Values represent one experiment. Red = Non-stained (A) or secondary antibody only (C) stained CHO cells. Green = Non-stained (A) or secondary antibody only (C) stained pgsA-745 cells. Orange = Rhodamine-PEI stained (A) or primary + secondary antibody stained (C) CHO cells. Blue = Rhodamine-PEI stained (A) or primary + secondary antibody stained (C) pgsA-745 cells.

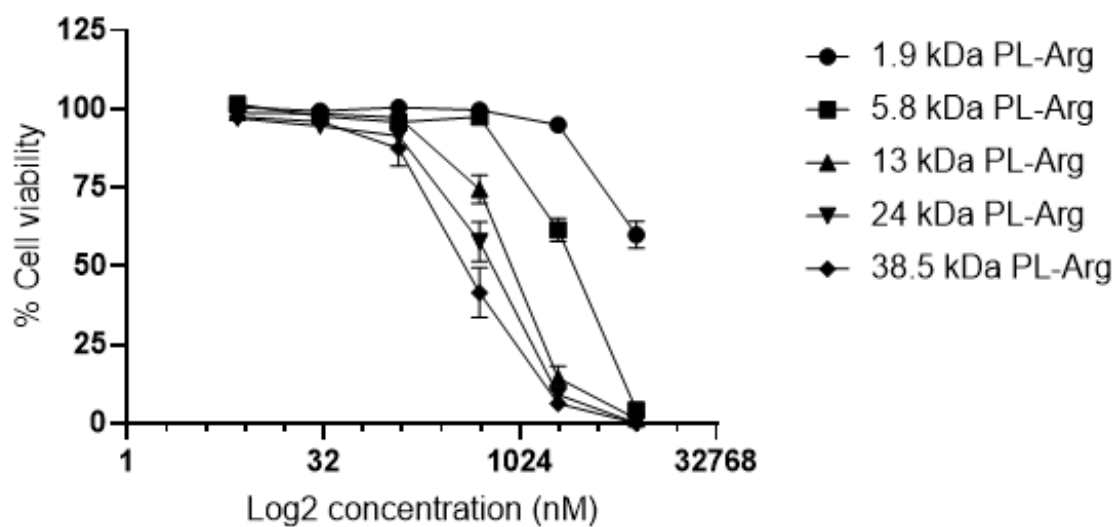

**Figure S9. IC50s for the GSC cell line NCH421K.** CelltiterGlo 3D viability dose-response of 24 h treated NCH421K cells. Values represent the mean of at least  $n = 3$  independent replicates. Error bars represent  $\pm$  one SEM.

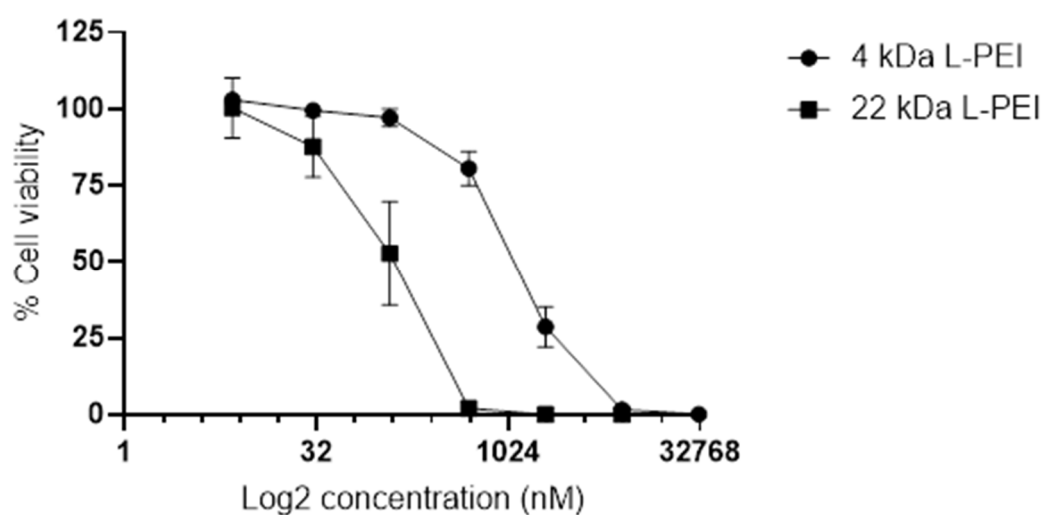

**Figure S10. IC50s for the GSC cell line NCH421K.** CelltiterGlo 3D viability dose-response of 24 h treated NCH421K cells. Values represent the mean of at least  $n = 3$  independent replicates. Error bars represent  $\pm$  one SEM.
